# Supplementary material
Source: publisher figshare collection journal article supplement (https://frontiersin.figshare.com/ndownloader/files/14809904)
Supplement: Supplementary file [file 14809904]

UNIVERSITY OF ILLINOIS  
AT URBANA - CHAMPAIGN

RECEIVED  
JAN 03 2013  
UIUC OPRS

Department of Kinesiology & Community Health

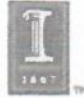

Louise Freer Hall  
906 South Goodwin Avenue  
Urbana, IL 61801-3895  
<http://www.kines.uiuc.edu>  
Telephone 217-300-1022

December 3th, 2017.

**MEDICAL RELEASE**

To the neurologist of \_\_\_\_\_ D.O.B. \_\_\_\_\_

Your patient has expressed interest in participating in a study investigating the effects of a training protocol for voluntary eye movements in Parkinson's Disease. We are including participants with unilateral involvement only, unilateral and axial involvement, or bilateral involvement without impairment of balance. Outcome measures include saccade latency, saccade duration, and saccade amplitude in reflexive and voluntary saccades. The protocol involves a large TV screen that will display visual targets arranged in circles of varying radii to train saccades up to 50 degrees of the participant's field of view. Participants will be asked to make approximately 120 saccades over the course of 30 min. There will be a total of eight training sessions. For participants with Parkinson's disease, pre and post assessments will be taken in an "ON" and "OFF medication state". For the "OFF-state", participants will be asked to start assessments at the time of scheduled medication intake but withhold from taking the medication for two hours. During the 2-hour testing session, in the "OFF-state", participants will perform an eye tracking assessment and the Movement Disorders Society-United Parkinson's Disease Rating Scale assessment (MDS-UPDRS). Immediately after the OFF-state eye tracking and MDS-UPDRS assessments, participants will be instructed to take their next

prescribed dose of medication and rest for 60 minutes before completing an "ON-state" eye tracking assessment. Please indicate whether in your medical judgment there are significant risks with a two-hour period delay in medication intake while performing assessments. If there is significant risk to your patient with disrupting medications they will be excluded from the study. Please complete the approval form in pages 4-7 if, in your medical judgment, this individual has no contraindications or serious health risks in participating in this study. Thank you for your time to read this summary and evaluate your patient's status for participation in this study. If you have any questions please do not hesitate to contact the principal investigator in the study, [REDACTED]

Thank you.

**To be completed by the participant**

Date\_\_\_\_\_

Name\_\_\_\_\_

Address\_\_\_\_\_

City/State/Zip\_\_\_\_\_

Phone(\_\_\_\_\_)\_\_\_\_\_ E-mail\_\_\_\_\_

Date of Birth(MM/DD/YYYY)\_\_\_\_\_

Primary Diagnosis\_\_\_\_\_

Date of Diagnosis(MM/DD/YYYY)\_\_\_\_\_

Emergency Contact Name\_\_\_\_\_

Relationship\_\_\_\_\_ Phone #(\_\_\_\_\_)\_\_\_\_\_

Do you have any allergies? \_\_\_\_\_ If yes, (please specify) \_\_\_\_\_

Have you ever been diagnosed with one of the following?

Diabetes(Y/N)\_\_\_\_(Insulin?\_\_\_\_) Parkinson's disease\_\_\_\_Hypertension\_\_\_\_Pulmonary Disease\_\_\_\_

20/20 or Corrected Vision (specify)\_\_\_\_Retinal Disease(specify)\_\_\_\_

Glaucoma\_\_\_\_ Ischemic Optic Neuropathy\_\_\_\_Pseudoexfoliation Syndrome\_\_\_\_ Ocular Surgery\_\_\_\_

Ocular Trauma\_\_\_\_ Cataracts\_\_\_\_ Orbital myositis\_\_\_\_

Other neurological disorders/injuries apart from Parkinson's Disease?\_\_\_\_ If yes, what was the diagnosis?  
\_\_\_\_\_

Have you undergone brain surgery (ex: for Deep Brain Stimulation)\_\_\_\_\_  
\_\_\_\_\_

Are you receiving Outpatient Therapy YES\_\_\_\_ NO\_\_\_\_

Please list any Surgeries including dates  
\_\_\_\_\_  
\_\_\_\_\_  
\_\_\_\_\_  
\_\_\_\_\_  
\_\_\_\_\_

Please list the medications that you are currently taking  
\_\_\_\_\_  
\_\_\_\_\_  
\_\_\_\_\_  
\_\_\_\_\_  
\_\_\_\_\_  
\_\_\_\_\_  
\_\_\_\_\_

Has there been a change in use of medication in the last 6 months? YES \_\_\_\_\_ NO \_\_\_\_\_

Do you have a family member or caretaker that can be present and aid in transport for the "OFF medication state" assessment days? YES \_\_\_\_\_ NO \_\_\_\_\_

By signing this document, I give permission to have my neurologist mail a medical release form to Prof.

[Redacted Signature Area]

Signature \_\_\_\_\_ Date \_\_\_\_\_

**To be completed by the participant's neurologist:**

Participants Name \_\_\_\_\_

Diagnosis (List All) \_\_\_\_\_

Does your patient meet the UK Brain Bank Diagnostic Criteria for PD? (y/n) \_\_\_\_\_

Please check all the PD related impairments:

\_\_\_\_\_ unilateral involvement only

\_\_\_\_\_ unilateral and axial involvement

\_\_\_\_\_ bilateral involvement without impairment of balance

\_\_\_\_\_ Other/higher level of involvement

Height \_\_\_\_\_ Weight \_\_\_\_\_ Pulse \_\_\_\_\_ BP \_\_\_\_\_ Sex \_\_\_\_\_

| Physical Exam | Normal | Abnormal | Explanation of Abnormalities |
|---------------|--------|----------|------------------------------|
| Head/Neck     | _____  | _____    | _____                        |
| Eyes/Vision   | _____  | _____    | _____                        |
| Ears/Hearing  | _____  | _____    | _____                        |
| Heart/Lung    | _____  | _____    | _____                        |
| G.I.          | _____  | _____    | _____                        |
| C.N.S.        | _____  | _____    | _____                        |
| Skin          | _____  | _____    | _____                        |

Dates of hospitalization over last two years with admitting diagnoses:

\_\_\_\_\_

\_\_\_\_\_

\_\_\_\_\_

\_\_\_\_\_

Significant "ABNORMAL TEST" EKG/X-RAY/LAB): \_\_\_\_\_

Medications (please list)

\_\_\_\_\_

\_\_\_\_\_

\_\_\_\_\_

\_\_\_\_\_

\_\_\_\_\_

Change in medication in the past 6 months YES \_\_\_\_\_ NO \_\_\_\_\_ If yes, specify

\_\_\_\_\_

Initiation of medications that influence walking/mobility/coordination in the past 30 days?



YES\_\_\_\_NO\_\_\_\_

Do you expect any changes in medication in the next two months?

YES\_\_\_\_NO\_\_\_\_

If your patient has PD, is your patient under Deep Brain Stimulation (DBS) treatment?

YES\_\_\_\_NO\_\_\_\_

If the participant has PD, is there significant risk associated with withholding from movement related medications for two hours from the regularly scheduled intake time and resuming intake immediately after the two hour delay period?

YES\_\_\_\_NO\_\_\_\_

Do you have any modifications to the medication intake delay time and continuation of intake after the two hour delay?

YES\_\_\_\_NO\_\_\_\_

IF YES, please clarify:

---

---

---

---

---

Is it safe for the participant to resume medications after a two hour delay period?

YES\_\_\_\_NO\_\_\_\_

IF NO, but there is a safe way to stop and resume medications, please provide instructions on how to stop and resume medication:

---

---

---

---

---

Approval for participation: YES \_\_\_\_\_ NO \_\_\_\_\_

Comments/Restrictions: \_\_\_\_\_  
\_\_\_\_\_  
\_\_\_\_\_

Address: \_\_\_\_\_

City: \_\_\_\_\_ State: \_\_\_\_\_ ZIP: \_\_\_\_\_

Physician's Signature: \_\_\_\_\_

Physician's Emergency Contact Telephone Number: \_\_\_\_\_

Date: \_\_\_\_\_

Permission to release patient information to the [REDACTED]  
[REDACTED] can be found at the bottom of page 3.

PLEASE MAIL TO:

•

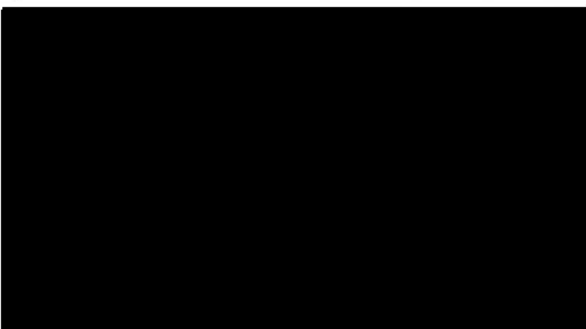

THANK YOU FOR YOUR PARTICIPATION.
